1 **A novel approach to develop wheat chromosome-specific KASP markers for**  
2 **detecting *Amblyopyrum muticum* segments in doubled haploid introgression**  
3 **lines**

4 Surbhi Grewal<sup>\*1</sup>, Benedict Coombes<sup>2</sup>, Ryan Joynson<sup>2,3</sup>, Anthony Hall<sup>2</sup>, John Fellers<sup>4</sup>, Cai-  
5 yun Yang<sup>1</sup>, Duncan Scholefield<sup>1</sup>, Stephen Ashling<sup>1</sup>, Peter Isaac<sup>5</sup>, Ian P. King<sup>1</sup>, Julie King<sup>1</sup>

6 <sup>1</sup> Nottingham BBSRC Wheat Research Centre, School of Biosciences, University of  
7 Nottingham, Loughborough, UK

8 <sup>2</sup> Earlham Institute, Norwich Research Park, Norwich, UK

9 <sup>3</sup> Current address: Limagrain Europe, Clermont-Ferrand, France

10 <sup>4</sup> USDA-ARS Hard Winter Wheat Genetics Research Unit, Manhattan, Kansas, USA

11 <sup>5</sup> iDna Genetics Ltd., Norwich Research Park, Norwich, UK

12 **\*Corresponding author: Surbhi Grewal**

13 [surbhi.grewal@nottingham.ac.uk](mailto:surbhi.grewal@nottingham.ac.uk)

14

15 Surbhi Grewal 0000-0002-0707-2504

16 Ryan Joynson 0000-0002-7979-4725

17 Benedict Coombes 0000-0003-4956-1055

18 Anthony Hall 0000-0002-1806-020X

19 John Fellers 0000-0003-3872-2909

20 Ian P. King 0000-0001-7017-0265

21 Julie King 0000-0002-7699-7199

22

23 **Declarations**

24 **Funding**

25 This research was funded by the Biotechnology and Biological Sciences Research Council  
26 (Grant No. BB/J004596/1 and BB/P016855/1) as part of the Wheat Improvement Strategic  
27 Programme (WISP) and Designing Future Wheat (DFW) programme.

28 **Conflicts of interest/Competing interests**

29 P.I. was employed by the company iDna Genetics Ltd. R.J. was employed by Earlham  
30 Institute while this work was carried out.

31 The remaining authors declare that the research was conducted in the absence of any  
32 commercial or financial relationships that could be construed as a potential conflict of  
33 interest.

34 **Availability of data and material**

35 Raw reads data for *Am. muticum* has been made available through the Grassroots data  
36 repository hosted by the Earlham Institute and funded by DFW programme  
37 ([https://opendata.earlham.ac.uk/wheat/under\\_license/toronto/Grewal\\_et\\_al\\_2021-09-  
38 13\\_Amybylopyrum\\_muticum/](https://opendata.earlham.ac.uk/wheat/under_license/toronto/Grewal_et_al_2021-09-13_Amybylopyrum_muticum/)). All DH lines used in this study are available through the

39 [Germplasm Resource Unit](#) at the John Innes Centre. The genotyping data is available from  
40 the corresponding author on reasonable request.

41 **Code availability**

42 Not applicable.

43 **Authors' contributions**

44 DNA extractions, C.Y., D.S. and S.A.; sequence generation, A.H. and J.F.; bioinformatics  
45 analysis, R.J., B.C. and A.H.; KASP assay design, S.G.; KASP assay validation and  
46 genotyping, S.A., D.S. and P.I.; GISH analysis, C.Y.; data analysis, S.G.;  
47 conceptualisation, I.P.K., J.K and S.G.; manuscript writing, S.G, I.P.K and J.K. and funding  
48 acquisition, I.P.K. and J.K. All authors have read and agreed to the published version of  
49 the manuscript.

50 **Ethics approval**

51 This article does not contain any studies with human participants or animals performed  
52 by any of the authors.

53 **Consent to participate**

54 This article does not contain any studies with human participants and thus, no consent to  
55 participate was sought.

56 **Consent for publication**

57 This article does not contain any studies with human participants and thus, no consent to  
58 publish was sought.

59 **ABSTRACT**

60 Many wild relative species are being used in pre-breeding programmes to increase the  
61 genetic diversity of wheat. Genotyping tools such as single nucleotide polymorphism  
62 (SNP)-based arrays and molecular markers have been widely used to characterise wheat-  
63 wild relative introgression lines. However, due to the polyploid nature of the recipient  
64 wheat genome, it is difficult to develop SNP-based KASP markers that are codominant to  
65 track the introgressions from the wild species. Previous attempts to develop KASP markers  
66 have involved both exome- and PCR-amplicon-based sequencing of the wild species. But  
67 chromosome-specific KASPs assays have been hindered by homoeologous SNPs within the  
68 wheat genome. This study involved whole genome sequencing of the diploid wheat wild  
69 relative *Amblyopyrum muticum* and development of a SNP discovery pipeline that  
70 generated ~38,000 SNPs in single-copy wheat genome sequences. New assays were  
71 designed to increase the density of *Am. muticum* polymorphic KASP markers. With a goal  
72 of one marker per 60 Mbp, 335 new KASP assays were validated as functional. Together  
73 with assays validated in previous studies, 498 well distributed chromosome-specific  
74 markers were used to recharacterize previously genotyped wheat-*Am. muticum* doubled  
75 haploid (DH) introgression lines. The chromosome specific nature of the KASP markers  
76 allowed clarification of which wheat chromosomes were involved with recombination  
77 events or substituted with *Am. muticum* chromosomes and the higher density of markers  
78 allowed detection of new small introgressions in these DH lines.

79

80 Keywords: wheat, wild relative, *Amblyopyrum muticum*, SNP, KASP, introgression

81

82 Key Message: A novel methodology to generate chromosome-specific SNPs between wheat  
83 and its wild relative *Amblyopyrum muticum* and their use in the development of KASP  
84 markers to genotype wheat-*Am. muticum* introgression lines.

## 85 1. INTRODUCTION

86 Bread wheat (*Triticum aestivum* L.,  $2n = 6x = 42$ , AABBDD) is one of the most widely  
87 grown and consumed crops worldwide. After two spontaneous interspecific hybridisation  
88 events (Dvořák et al. 1993; Marcussen et al. 2014; Pont et al. 2019), resulting in its  
89 allohexaploid genome, domestication and intensive breeding practices have reduced the  
90 genetic diversity available within and between modern bread wheat cultivars. The wild  
91 relatives of wheat, however, have a vast resource of untapped genetic variation that could  
92 be used to enrich and diversify the wheat genome. Recent studies have demonstrated the  
93 dramatic improvement in wheat-wild relative introgressions achieved through  
94 homoeologous recombination and genomics-based marker technologies (Qi et al. 2007;  
95 Tiwari et al. 2014; King et al. 2017; Grewal et al. 2018b; Cseh et al. 2019b; Xu et al.  
96 2020).

97 Detection and characterisation of wild relative chromatin in a wheat background is an  
98 important requirement in wheat breeding programmes. Molecular markers provide a high-  
99 throughput and cost-effective way of achieving this and simple sequence repeats (SSRs)  
100 have been a popular marker system for the detection of wild relative introgressions  
101 because of their multi-allelic and co-dominant nature (Wu et al. 2006; Zhao et al. 2013;  
102 Fricano et al. 2014; Niu et al. 2018). However, with recent advances in Next Generation  
103 Sequencing (NGS) technologies and low-cost genome sequencing, single nucleotide  
104 polymorphism (SNP) markers are now the front-runner in the race to developing high-  
105 throughput genotyping platforms for marker-assisted selection (MAS) in crop breeding  
106 (Varshney et al. 2009; Rasheed et al. 2017). Exome-based sequencing of wheat varieties  
107 and wild relative species has resulted in a huge resource of SNPs (Winfield et al. 2012;  
108 Allen et al. 2013), which has been exploited to develop high-density SNP wheat genotyping  
109 arrays (Wang et al. 2014; Winfield et al. 2016; Allen et al. 2017). Wild relative  
110 introgressions have been detected in a wheat background using such wheat-based SNP  
111 arrays (Zhang et al. 2017; Zhou et al. 2018).

112 Genotyping of introgression lines is more efficient when using wild-relative genome-  
113 specific SNPs. The Axiom<sup>®</sup> Wheat-Relative Genotyping SNP Array was developed (King et  
114 al. 2017) and used to detect introgressions from various wild species in a wheat  
115 background (Grewal et al. 2018a; Grewal et al. 2018b; King et al. 2018; Cseh et al. 2019a;  
116 Devi et al. 2019; Baker et al. 2020). Even though these genotyping arrays can be ultra-  
117 high-throughput and efficient, these SNPs cannot distinguish between homozygous and  
118 heterozygous individuals which limits their widespread use in crop breeding. Recently,  
119 whole genome and transcriptome sequencing have been used to develop genome-specific  
120 SNPs for *Lophopyrum elongatum* and tools such as high-resolution melting (HRM) markers  
121 and the Sequenom MassARRAY SNP genotyping platform, utilising these SNPs, were  
122 deployed for detecting *L. elongatum* introgressions in a wheat background (Lou et al.  
123 2017; Xu et al. 2020).

124 The Kompetitive allele-specific PCR (KASP) platform has been demonstrated to be a  
125 flexible, efficient and cost-effective system for genotyping of introgression lines using wild  
126 relative genome-specific SNPs (Bansal et al. 2020; Grewal et al. 2020b; Han et al. 2020).  
127 However, hexaploid wheat's polyploid genome makes it complicated to develop co-  
128 dominant interspecific SNPs. The first obstacle is the distinction between interspecific and  
129 an excess of homoeologous/paralogous SNPs found within the wheat genome. The second  
130 hurdle to overcome is the scoring of interspecific SNPs in segregating populations where  
131 the SNP has three homoeologous copies in the wheat genome. In such cases, it is difficult  
132 to differentiate between a heterozygous and a homozygous introgression line in a self-  
133 fertilized backcross population (Allen et al. 2011). Recently, Grewal et al. (2020a)  
134 addressed this problem by attempting to exploit interspecific SNPs with KASP assays that

135 only had one copy of the template in the wheat genome. They reported wild relative  
136 genome-specific SNPs for ten species from the *Amblyopyrum*, *Aegilops*, *Thinopyrum*,  
137 *Triticum* and *Secale* genera using PCR-amplicon based sequencing of which, 620 were  
138 validated as chromosome-specific KASP markers in the wheat genome.

139 In this work, a more efficient bioinformatics-based approach was used to develop  
140 chromosome-specific KASP markers between *Amblyopyrum muticum* Eig. ( $2n = 2x = 14$ ,  
141 TT) and bread wheat. Whole genome sequence of *Am. muticum* was generated using next  
142 generation sequencing and compared with the bread wheat cv. Chinese Spring,  
143 RefSeqv1.0 (Appels et al. 2018) high-quality reference genome sequence. Unlike previous work  
144 (Grewal et al. 2020a), only single-copy regions of the wheat genome were used for SNP  
145 discovery. A small subset of the SNPs were validated as KASP markers by genotyping a  
146 previously reported panel of doubled haploid wheat-*Am. muticum* introgression lines (King  
147 et al. 2019), increasing the density of KASP markers diagnostic for *Am. muticum*. The  
148 methodology reported here and the resulting KASP markers can be applied to other wheat-  
149 wild relative introgression studies and thus represents a valuable resource for the wheat  
150 research community.

## 151 **2. MATERIALS AND METHODS**

### 152 **2.1 Plant Material**

153 Four hexaploid wheat varieties (Chinese Spring, Paragon, Pavon76 and Highbury), three  
154 accessions of *Am. muticum* (2130004, 2130008 and 2130012; all obtained from the  
155 Germplasm Resource Unit at the John Innes Centre), three wheat-*Am. muticum* F<sub>1</sub> lines  
156 (one with each accession of *Am. muticum*) and 67 doubled haploid (DH) wheat-*Am.*  
157 *muticum* introgression lines (King et al. 2019) were grown for leaf tissue collection and  
158 nucleic acid extraction.

159 All plants were grown in a glasshouse in 2L pots containing John Innes No. 2 soil and  
160 maintained at 18–25°C under 16 h light and 8 h dark conditions. Leaf tissues were  
161 harvested from 3-week-old plants, immediately frozen on liquid nitrogen and stored  
162 at -80°C until nucleic acid extraction.

### 163 **2.2 Nucleic Acid Extraction**

164 Leaf tissue (1.5 inch leaf segment cut into pieces) was harvested, frozen and lyophilised  
165 in a 2 ml 96 deep-well plate following which the samples were ground in the TissueLyser  
166 II (QIAGEN) using a steel ball in each well for 4-6 minutes at a frequency of 25 Hz.  
167 Genomic DNA for sequencing and genotyping was extracted according to the [Somers and](#)  
168 [Chao protocol](#) (verified 10 September, 2021, original reference in Pallotta et al. 2003)  
169 from Step 2 onwards. For wild relatives with multiple accessions, the genomic DNA was  
170 pooled into one sample.

171 Genomic DNA extraction for generation of probes for genomic *in situ* hybridisation analysis,  
172 was carried using the above protocol with an additional step of purification with  
173 phenol/chloroform at the end.

### 174 **2.3 Chromosome-specific SNP Discovery**

175 DNA was isolated from *Am. muticum* accession 2130012, as described above, and a PCR-  
176 free library was prepared and sequenced on an Illumina HiSeq 2500 on rapid run mode to  
177 produce 101.86 Gb (~16.50x coverage of *Am. muticum* assuming kew c-value genome  
178 size of 6.174 Gbp) of 250bp paired-end reads. To discover SNPs, the reads were mapped  
179 to the wheat reference genome assembly RefSeq v1.0 (Appels et al. 2018) using BWA  
180 MEM version 0.7.13 (Li 2013) with the -M flag. PCR duplicates were removed using Picard's  
181 MarkDuplicates (DePristo et al. 2011) and alignments were filtered using SAMtools v1.4

182 (Li et al. 2009) to remove unmapped reads, supplementary alignments, improperly paired  
183 reads, and non-uniquely mapping reads ( $q < 10$ ). Variant calling was performed using  
184 bcftools (Li 2011) using the multi-allelic model (-m). INDELS and heterozygous SNPs were  
185 removed and homozygous SNPs filtered using GATK VariantFiltration (DePristo et al.  
186 2011). SNPs were retained if depth  $\geq 5$ , allele frequency (AF)  $> 0.8$  and quality score  
187  $\geq 30$ . To remove SNPs unsuitable for KASP assays, SNPs were removed if any other SNP  
188 was present within 50bp up or downstream. To prevent amplification of off-target regions  
189 in the genome, the SNP site along with 50bp up and downstream was aligned to RefSeq  
190 v1.0 using BLASTn (Camacho et al. 2009) and queries with any non-self-hits were  
191 discarded.

## 192 **2.4 KASP Assay Design and Genotyping**

193 To design a KASP™ assay, the flanking sequence of a SNP was fed through the PolyMarker  
194 application (Ramirez-Gonzalez et al. 2015) which aligned the query sequence to RefSeq  
195 v1.0 and provided two allele-specific primers and one common primer for each assay. A  
196 value of 1 in the 'total\_contigs' column of the output Primers file validated the query SNP  
197 to be in a single-copy region in the wheat genome RefSeq v1.0 assembly (Online Resource  
198 2).

199 For genotyping purposes, three sets of KASP markers were used. Set 1 consisted of 150  
200 chromosome-specific KASP markers previously reported to be polymorphic between wheat  
201 and *Am. muticum* (codes between WRC0001-1000; Grewal et al. 2020a). Set 2 consisted  
202 of 224 KASP assays designed to be tested on doubled haploid wheat-*Triticum urartu*  
203 introgression lines (codes between WRC1080-1308 and WRC1317-1393; Grewal et al.  
204 2021). This is a subset of the 304 KASP markers developed in this study after 47 failed to  
205 amplify a PCR product and 33 were polymorphic between the parental wheat cultivars. Set  
206 3 consisted of the new KASP assays designed in this study (codes between WRC1309-  
207 1316, WRC1394-1713, WRC1723-1872, WRC1894-1913, WRC1954-2113 and WRC2130-  
208 2169; Online Resource 2).

209 The genotyping procedure was as described by Grewal et al. (2020b). Briefly, the  
210 genotyping reactions were set up using the automated PIPETMAX® 268 (Gilson, UK) and  
211 performed in a ProFlex PCR system (Applied Biosystems by Life Technology) in a final  
212 volume of 5  $\mu$ l with 1 ng genomic DNA, 2.5  $\mu$ l KASP reaction mix (ROX), 0.068  $\mu$ l primer  
213 mix and 2.43  $\mu$ l nuclease free water. PCR conditions were set as 15 min at 94°C; 10  
214 touchdown cycles of 10 s at 94°C, 1 min at 65–57°C (dropping 0.8°C per cycle); and 35  
215 cycles of 15 s at 94°C, 1 min at 57°C. Fluorescence detection of the reactions was  
216 performed using a QuantStudio 5 (Applied Biosystems) and the data analysed using the  
217 QuantStudio™ Design and Analysis Software V1.5.0 (Applied Biosystems).

## 218 **2.5 Multi-colour Genomic *in situ* Hybridisation (mc-GISH)**

219 Preparation of the root-tip metaphase chromosome spreads, the protocol for mcGISH and  
220 the image capture was as described in Grewal et al. (2020b). Briefly, genomic DNA from  
221 *T. urartu* (to detect the A-genome), *Aegilops speltoides* (to detect the B-genome), and  
222 *Aegilops tauschii* (to detect the D-genome) and *Am. muticum* were isolated as described  
223 above. The genomic DNA of (1) *T. urartu* was labelled by nick translation with  
224 ChromaTide™ Alexa Fluor™ 488-5-dUTP (Invitrogen; C11397; coloured green), (2) *Ae.*  
225 *speltoides* was labelled by nick translation with DEAC-dUTP (Jena Bioscience; NU-803-  
226 DEAC; coloured blueish purple), (3) *Ae. tauschii* was labelled with ChromaTide™ Alexa  
227 Fluor™ 594-5-dUTP (Invitrogen; C11400; coloured yellow) and 4) *Am. muticum* was  
228 labelled by nick translation with ChromaTide™ Alexa Fluor™ 546-14-dUTP (Invitrogen;  
229 C11401; coloured red). Slides were probed using 150 ng of *T. urartu*, 150 ng of *Ae.*  
230 *speltoides*, 300 ng of *Ae. tauschii* and 50 ng of *Am. muticum* labelled genomic DNAs, in



231 the ratio 3:3:6:1 (green: blue: yellow: red). No blocking DNA was used. DAPI was used  
232 for counterstaining all slides. Metaphases were detected using a high-throughput, fully  
233 automated Zeiss Axio ImagerZ2 upright epifluorescence microscope (Carl Zeiss Ltd.,  
234 Oberkochen, Germany). Image capture was performed using a MetaSystems Coolcube 1m  
235 CCD camera and image analysis was carried out using Metafer4 (automated metaphase  
236 image capture) and ISIS (image processing) software (Metasystems GmbH, Altlusheim,  
237 Germany).

### 238 3. Results

#### 239 3.1 Generation of chromosome-specific SNPs

240 Alignment of *Am. muticum* WGS reads against the wheat reference genome RefSeq v1.0  
241 and filtering for good quality uniquely mapped reads led to the identification of 38,137  
242 SNPs in single-copy regions of the wheat genome (Online Resource 1). Fig. 1 shows the  
243 total number of SNPs found per wheat chromosome. In each homoeologous group the D  
244 genome chromosomes were found to have the most SNPs with *Am. muticum* with  
245 Chromosome 5D having the highest number of SNPs (3326) while chromosome 4A had  
246 the least (942).

247 SNP density across 1,416 bins of 10 Mb each ranged from 0 (45 bins) to 221 SNPs  
248 (chr3D:600000000-610000000 Mbp). Fig. 2b depicts the range of SNP densities found  
249 across the wheat genome and bins with greater than 50 SNPs are shown in black. Of the  
250 190 bins with more than 50 SNPs, 46 were present on A genome chromosomes, 19 on the  
251 B genome and 125 on the D genome. Most of the latter were found on the distal ends of  
252 D genome chromosomes (Fig. 2b).

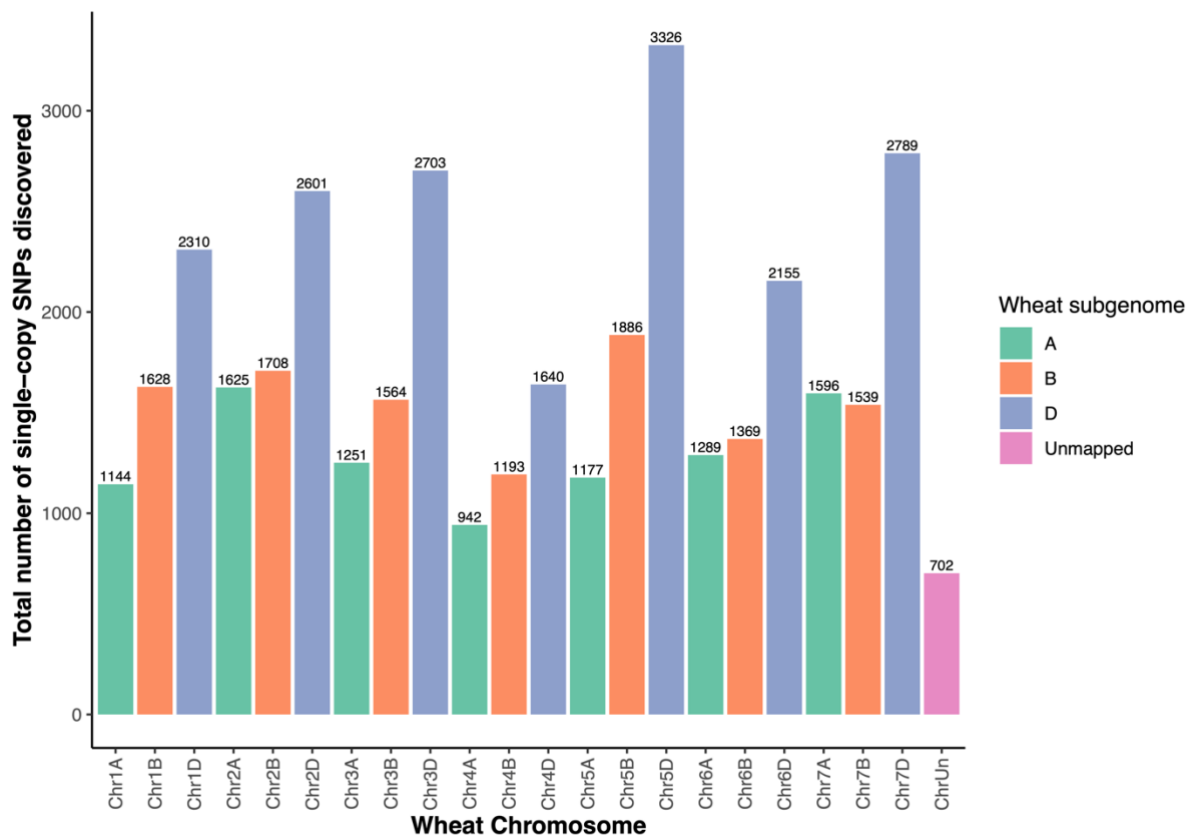

253

254 **Fig. 1** Plot showing the number of SNPs on each wheat chromosome, identified as  
255 polymorphic between hexaploid wheat and *Am. muticum* in single-copy regions of the  
256 wheat genome.

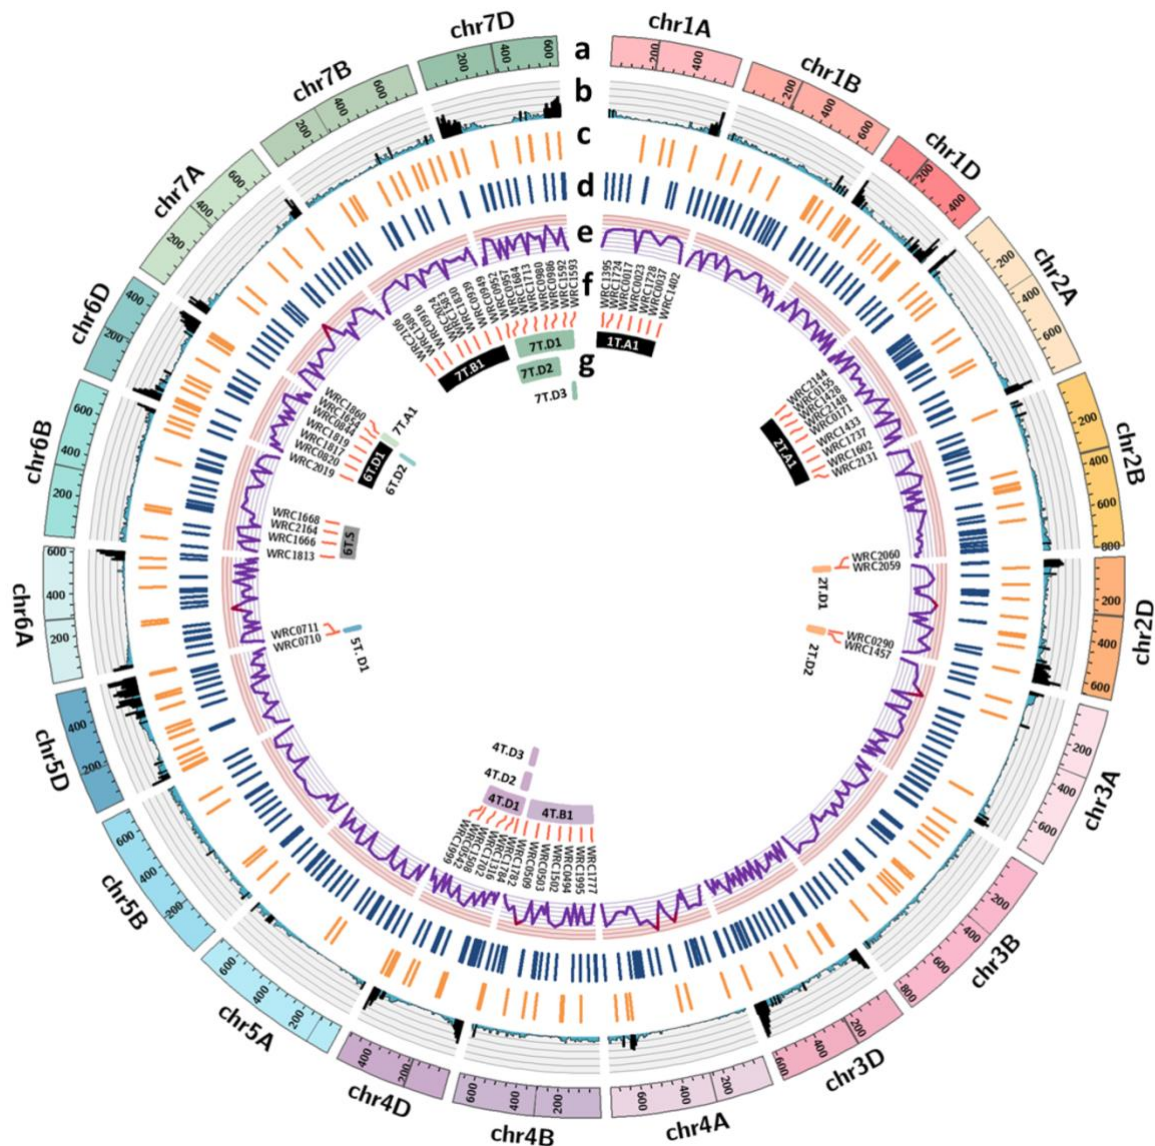

257

258 **Fig. 2** Circos plots of **a.** hexaploid wheat chromosomes (200 = 200 Mbp) with horizontal  
 259 lines indicating position of centromere; **b.** SNP density in 10 Mbp bins (black = bins with  
 260 >50 SNPs; starting at 0, each grid-line on the y-axis = 44.2 SNPs); **c.** position of functional  
 261 chromosome-specific KASP markers in Set 1 and Set 2; **d.** position of functional  
 262 chromosome-specific KASP markers in Set 3; **e.** distance between adjacent KASP markers  
 263 on a wheat chromosome (red line = where distance between two markers >60 Mbp;  
 264 starting at 0, each grid-line on the y-axis = 10.31 Mbp); **f.** a selection of KASP markers  
 265 that detect all the introgression in the wheat-*Am. muticum* DH introgression lines; **g.**  
 266 introgressions in the DH lines, coloured according to the corresponding recombinant wheat  
 267 chromosome (black = disomic substitution, grey = disomic addition).

268

### 269 3.2 Chromosome-specific KASP marker development

270 Set 2 KASP markers previously developed and tested on *T. urartu* introgression lines  
 271 (Grewal et al. 2021) were tested on wheat parental cultivars and *Am. muticum* accessions  
 272 in this study. Of the 224 markers in this set, 194 (~86.6%) failed to detect the *Am.*  
 273 *muticum* allele, 17 (~7.6%) were monomorphic between wheat and *Am. muticum* and 13



274 (~5.8%) were found to be polymorphic between wheat and *Am. muticum* accessions used  
275 in this study. The positions on the wheat chromosomes of these 13 markers together with  
276 the 150 from set 1, previously developed and validated to be polymorphic between wheat  
277 and *Am. muticum* (Grewal et al., 2020a), are shown in Fig. 2c.

278 With the aim of having a KASP marker every 60 Mbp on a wheat chromosome, 698 new  
279 KASP assays were designed (Online Resource 2) in gap regions and tested on wheat, *Am.*  
280 *muticum* and three wheat-*Am. muticum* F<sub>1</sub> lines in this study. Of these, 251 (~36%) failed  
281 at the PCR stage, 49 (~7%) did not amplify the *Am. muticum* allele, 22 (~3.2%) were  
282 polymorphic within the wheat cultivars used as controls and 10 (~1.4%) were  
283 monomorphic between wheat and *Am. muticum*. Of the remaining 366 KASP markers that  
284 were polymorphic between wheat and *Am. muticum*, 31 failed to detect the *Am. muticum*  
285 allele in the heterozygous state. Thus, 335 KASP markers were found to be functional and  
286 robust and their positions on the wheat chromosomes are indicated in Fig. 2d.

287 In total, 498 well-distributed, chromosome-specific KASP markers (Online Resource 3),  
288 polymorphic between wheat and *Am. muticum*, were used for downstream genotyping of  
289 introgression lines. Fig. 2e shows a line plot of the physical distance between these  
290 markers in wheat where each gridline of the y axis represents 10 Mb physical distance on  
291 a chromosome. The distance between the markers ranged from just 3 bases to ~82.5 Mb  
292 with an average distance of 26 Mb. The average distance between the tip of the short arm  
293 and the first marker on the arm was 2.9 Mb while that from the last marker to the end of  
294 the long arm was 2.3 Mb. There were only seven instances where the gap between two  
295 KASP markers exceeded the desired 60 Mb and these are shown with a red stroke in the  
296 line in Fig. 2e. All these gaps were due to poor availability of SNPs within the desired bin  
297 as shown by the corresponding SNP density plot (Fig. 2b).

### 298 **3.3 Validation of KASP markers through genotyping of introgression lines**

299 The set of 498 chromosome-specific KASP markers, containing markers developed in  
300 previous studies and in this work, were used to genotype 67 DH wheat-*Am. muticum*  
301 introgression lines (King et al., 2019) along with parental wheat cultivars, *Am. muticum*  
302 accessions and F<sub>1</sub> lines as controls. Previously, these DH lines were characterised using  
303 the Axiom® 36K Wheat Relative Genotyping Array and multi-colour genomic *in situ*  
304 hybridisation (mcGISH) (King et al. 2017; King et al. 2019). The former technique  
305 provided information about what homoeologous group(s) from *Am. muticum* had  
306 introgressed into wheat and the latter identified the wheat subgenome(s) the *Am. muticum*  
307 segment(s) had recombined with and/or substituted, although, a drawback of the mcGISH  
308 technique is that it is unable to visually detect chromosome segments that are smaller  
309 than 18-20 Mbp.

310 In the current study, a homozygous introgression was detected through the presence of a  
311 homozygous *Am. muticum* allele called by KASP markers in the chromosome region the  
312 segment had recombined with or substituted (due to the absence of the wheat allele it had  
313 replaced) and through heterozygous calls by KASP markers that were present on  
314 homoeologous chromosomal regions in wheat (since these markers are also designed to  
315 be polymorphic with the introgressed *Am. muticum* segment but the corresponding wheat  
316 allele had not been replaced). Through genotyping of the DH lines with these chromosome-  
317 specific KASP markers we were able to validate most of the previous results and, in  
318 addition, identify the specific wheat chromosomes that the introgressions from *Am.*  
319 *muticum* had recombined with or substituted (Table 1). The markers helped in identifying  
320 specific cases of aneuploidy in some DH lines to support the GISH observations but also  
321 suggested disparities with previously reported results.

322 **Table 1** Details of the type of introgression, its code (as indicated in Fig. 2g), and the  
 323 wheat chromosome it had recombined with or substituted in each wheat-*Am. muticum* DH  
 324 line as indicated through genotyping with chromosome-specific KASP markers.  
 325 Observations about the chromosome constitution (deletions and aneuploidy) are also  
 326 shown.

| DH Line name                                                     | Introgression Type: whole (W), arm (Telo), or recombinant (R) | Segment code <sup>a</sup> (A, B, D and T genomes represented as letters) | Wheat chromosome recombined with (if R) or substituted (if W) | Observations about chromosome constitution                                                        |
|------------------------------------------------------------------|---------------------------------------------------------------|--------------------------------------------------------------------------|---------------------------------------------------------------|---------------------------------------------------------------------------------------------------|
| DH-1                                                             | W                                                             | 6T.D1                                                                    | 6D                                                            |                                                                                                   |
| DH-6, 7, 8, 10, 11, 13, 339                                      | R                                                             | 2T.D2                                                                    | 2D                                                            |                                                                                                   |
| DH-15                                                            | W, R                                                          | 2T.A1, 4T.B1                                                             | 2A, 4B                                                        |                                                                                                   |
| DH-16                                                            | W, R, R                                                       | 2T.A1, 4T.B1, 6T.D2                                                      | 2A, 4B, 6D                                                    |                                                                                                   |
| DH-17, 18, 20, 21                                                | R, R                                                          | 4T.B1, 6T.D2                                                             | 4B, 6D                                                        |                                                                                                   |
| DH-19                                                            | R, R, W                                                       | 4T.B1, 6T.D2, 7T.B1                                                      | 4B, 6D, 7B                                                    |                                                                                                   |
| DH-28                                                            | Telo                                                          | 6T.S <sup>b</sup>                                                        | -                                                             |                                                                                                   |
| DH-29                                                            | W                                                             | 7T.B1                                                                    | 7D                                                            |                                                                                                   |
| DH-62, 71, 74, 348                                               | R, R                                                          | 4T.D2, 7T.A1                                                             | 4D, 7A                                                        |                                                                                                   |
| DH-63, 65, 66, 76, 77, 81, 341, 360                              | R                                                             | 4T.D2                                                                    | 4D                                                            | 1D is missing in DH81, 7BL <sup>b</sup> missing in DH-360                                         |
| DH-83, 84, 85, 92                                                | R                                                             | 5T.D1                                                                    | 5D                                                            | 4BL is missing in DH-83 and DH-92                                                                 |
| DH-86, 91, 94                                                    | R                                                             | 2T.D1                                                                    | 2D                                                            | 4 copies of 2D; interstitial deletion in 4A in DH-86                                              |
| DH-89                                                            | R, R                                                          | 2T.D1, 5T.D1                                                             | 2D, 5D                                                        | 4 copies of 2D; interstitial deletion in 4A                                                       |
| DH-96, 97                                                        | R                                                             | 4T.D3                                                                    | 4D                                                            | 1DS is missing in DH-97                                                                           |
| DH-121                                                           | R, R, R                                                       | 4T.D1, 5T.D1, 7T.D1                                                      | 4D, 5D, 7D                                                    |                                                                                                   |
| DH-122                                                           | R, R                                                          | 5T.D1, 7T.D1                                                             | 5D, 7D                                                        |                                                                                                   |
| DH-123                                                           | R                                                             | 7T.D1                                                                    | 7D                                                            |                                                                                                   |
| DH-124, 126, 128, 129, 131, 134, 137-139, 141, 144, 147, 355-357 | -                                                             | -                                                                        | -                                                             | 1AL-1BL translocation<br>Tetraploid for 1A<br>Deletion of 1B not involved in 1A-1BL translocation |
| DH-161                                                           | W                                                             | 1T.A1                                                                    | 1A                                                            | 7D is missing                                                                                     |
| DH-191, 192, 198, 202, 203                                       | R                                                             | 7T.D2                                                                    | 7D                                                            |                                                                                                   |
| DH-193, 195-197                                                  | R, R                                                          | 7T.D2, 7T.D3                                                             | 7D, 7D                                                        |                                                                                                   |

327 <sup>a</sup> From Fig. 2g

328 <sup>b</sup> S = short-arm, L = Long-arm

329

330 A subset of KASP markers that detect the *Am. muticum* introgressions present in these  
331 DH lines and the positions of these introgressions in the wheat genome are shown in Figs.  
332 2f and 2g, respectively. In total, 17 different introgressions were found to be present in  
333 these lines, using this new set of chromosome-specific KASP markers, including 4 whole  
334 chromosome introgressions from 1T, 2T, 6T and 7T, a telocentric introgression of the short  
335 arm of chromosome 6T and 12 large and small segments from chromosomes 2T, 4T, 5T,  
336 6T and 7T that had recombined with various wheat chromosomes (Table 1 and Fig. 2g).

### 337 **3.4 Deviations/Differences from previous characterisation of DH lines**

338 As mentioned above, KASP markers that detect the introgression on the recombinant  
339 chromosome result in a homozygous call for the *Am. muticum* allele. In Figs. 3a-c, which  
340 show genotyping results of some of the DH lines, these homozygous *Am. muticum* calls  
341 are indicated in green. Markers on homoeologous wheat chromosomes that also detect  
342 the same introgression give heterozygous calls that are shown in red. The three wheat  
343 subgenomes are represented in shades of blue and indicate the presence of the wheat  
344 allele for KASP markers in those chromosomal regions. Fig 3b and 3c also show that  
345 heterozygous calls identifying introgressions from *Am. muticum* chromosomes were also  
346 obtained on non-homoeologous chromosomes in wheat due to chromosome  
347 rearrangements within wheat that were not present in *Am. muticum* such as the 4/5/7  
348 translocation (Devos et al. 1995; Dvorak et al. 2018).

349 Previously, DH lines 15 and 16 were characterised as having two large introgressions from  
350 *Am. muticum* chromosomes 2T and 4T, both recombined with B genome chromosomes in  
351 wheat (King et al. 2019). Genotyping of these lines in this study showed that although  
352 chromosome 4T did recombine with chromosome 4B of wheat (4T.B1; Fig. 3a),  
353 chromosome 2T was introgressed as a whole chromosome that substituted a majority of  
354 chromosome 2A of wheat (2T.A1; Fig. 3a). KASP markers on the distal end of the short  
355 arm of chromosome 2A indicate that a very small segment of 2AS (~12 Mbp) is potentially  
356 still present in these lines (Fig. 3a). However, GISH indicated that the 2T was potentially  
357 introgressed as a whole chromosome due to the presence of *Am. muticum* telomeric repeat  
358 signals on both ends of this introgression (Fig. 3d). If the 2AS segment had recombined  
359 with 2T or translocated onto another wheat chromosome, it would not be visible via GISH  
360 due to its small size.

361 The markers also showed that DH lines 16-21 had a small 6T segment (up to 10 Mb) on  
362 the distal end of 6DL (6T.D2; Fig. 3a) which was not previously detected by the Axiom  
363 array and is not visible by GISH. Genotyping analysis of four other DH lines 62, 71, 74 and  
364 348, showed that in addition to the 4T.D2 segment, a very small segment (up to 20 Mb)  
365 from 7T was present at the distal end of 7AS (7T.A1; Fig. 3b) which had not been detected  
366 before in these lines. This very small segment on the distal end of chromosome 7AS was  
367 also detected by GISH in this study (Fig. 3e). The KASP markers were also able to detect  
368 another small segment (between 20-30 Mbp) from chromosome 5T in DH lines 121 and  
369 122 (5T.D1; Fig. 3c). Due to its slightly bigger size, this *Am. muticum* segment can be  
370 viewed by GISH on the distal end of chromosome 5DL in DH-122 as shown in Fig. 3f.

371 Genotyping analysis of 15 DH lines (codes between DH 124-147 and DH 355-357), all  
372 shown previously to have a 1T introgression on chromosome 1A (King et al. 2019), showed  
373 that no introgression from *Am. muticum* was present in these lines. The absence of any  
374 call for the majority of the KASP markers on chromosome 1B indicated that these lines  
375 had lost the pair of 1B chromosomes but a small segment from the distal end of 1BL (~50  
376 Mbp) had been retained as indicated by the presence of wheat alleles for markers in this  
377 region. This new information potentially indicates that the translocation previously  
378 observed by mcGISH on a pair of 1A chromosomes and thought to be IT, was from  
379 chromosome 1BL.

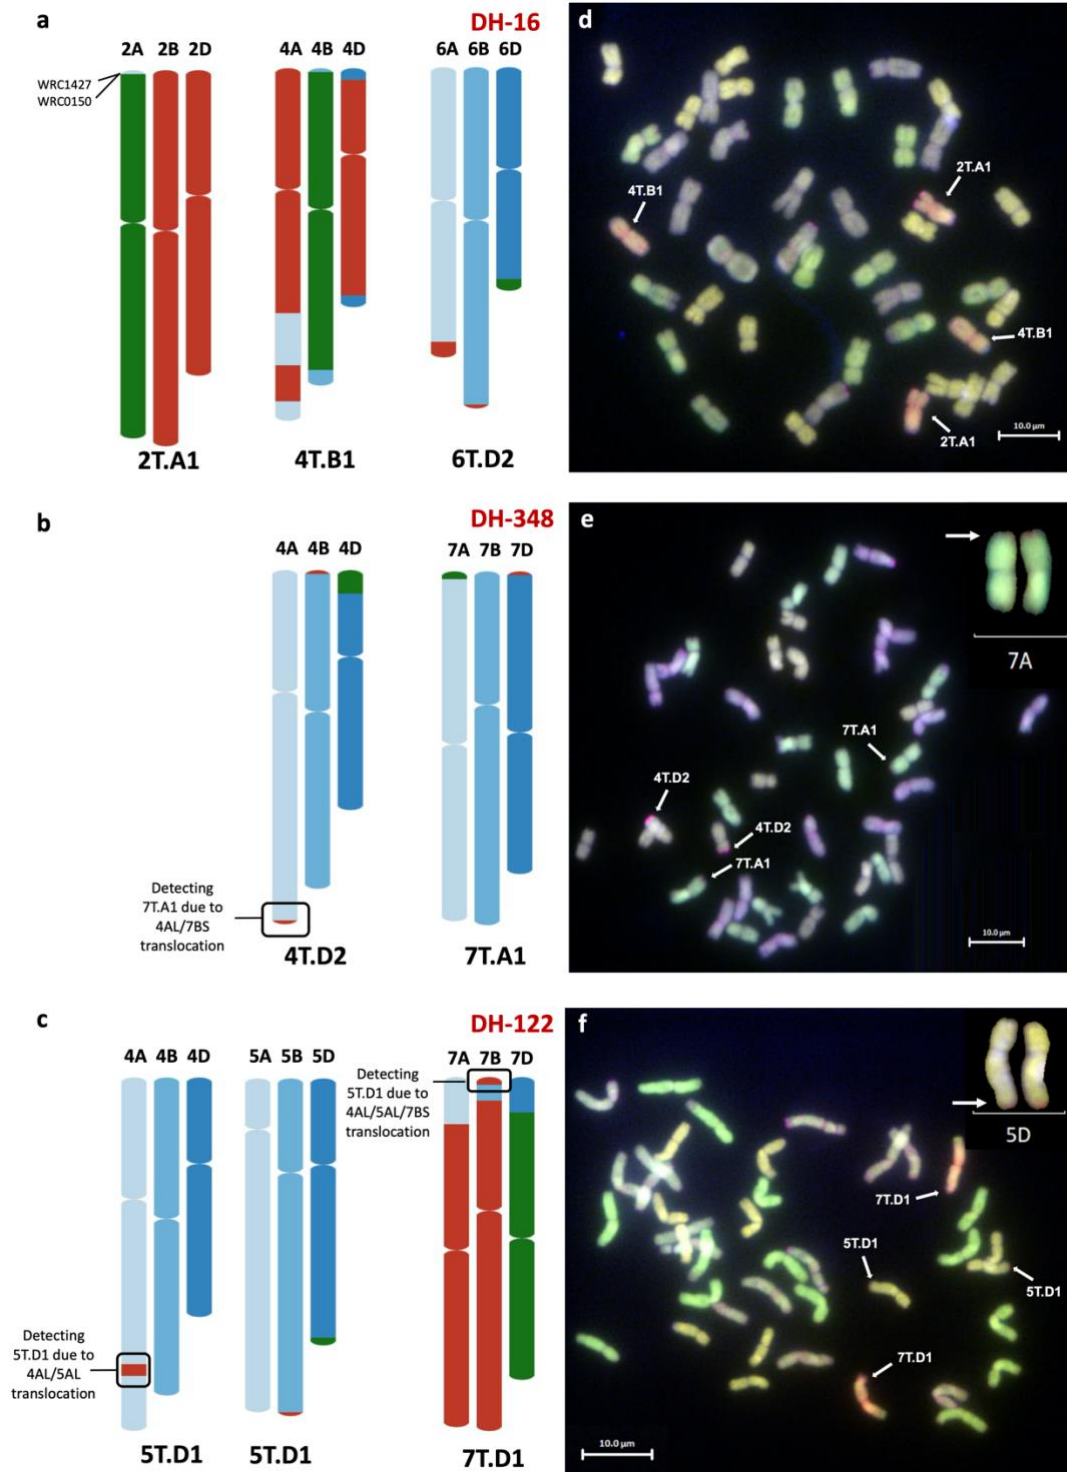

380

381 **Fig. 3** New small introgressions detected in wheat-*Am. muticum* DH introgression lines  
 382 using chromosome-specific KASP markers. Graphical representation of KASP marker data  
 383 detecting *Am. muticum* introgressions on wheat chromosomes in lines **a.** DH-16; **b.** DH-  
 384 348 and **c.** DH-122. Shades of blue represent presence of homozygous wheat alleles, red  
 385 indicates heterozygous calls and green indicates presence of homozygous *Am. muticum*  
 386 alleles. McGISH analysis of root metaphase spreads validating marker data in **d.** DH-16;  
 387 **e.** DH-348 and **f.** DH-122. Green indicates A-genome chromosomes, blueish grey indicates  
 388 B genome, yellow indicates D genome and red indicates *Am. muticum* genome. White  
 389 arrows point towards *Am. muticum* introgressed segments or chromosomes.

## 390 **4. Discussion**

391 Previous studies have reported chromosome-specific KASP markers between wheat and  
392 *Am. muticum* (Grewal et al. 2020a) and other wild relative species (Grewal et al. 2020b;  
393 Grewal et al. 2021), which have been used for genotyping wheat-wild relative introgression  
394 lines. The objective of this work was to fill in the gaps with more KASP markers to increase  
395 the efficiency of genotyping by using an approach that involved faster SNP discovery and  
396 a more robust, chromosome-specific assay design than the ones reported in previous  
397 studies. In this work, we produced ~38K SNPs between wheat and its wild relative *Am.*  
398 *muticum* in single-copy regions of the wheat genome and then converted some of these  
399 into wheat chromosome-specific KASP markers. In combination with previously designed  
400 chromosome KASP markers, a new set of well-distributed markers was obtained and used  
401 to re-genotype wheat-*Am. muticum* DH introgression lines (King et al. 2019) to validate  
402 the functionality of these markers as efficient genotyping tools and detect as many *Am.*  
403 *muticum* introgressions as possible.

404 A recently developed set of KASP markers (Set 2) was tested on *Am. muticum* accessions  
405 in this study but only 5.8% of the 224 assays were found to be polymorphic with wheat.  
406 This was as expected since this set of markers was originally developed to detect *T. urartu*  
407 introgressions in a wheat background (Grewal et al. 2021). When the 13 KASP markers  
408 were added to the 150 *Am. muticum* KASP markers developed during the original study  
409 (Grewal et al. 2020a), numerous gaps between markers were still present (Fig. 2c)  
410 preventing a uniform spread of markers able to detect *Am. muticum* introgressions across  
411 the whole of the wheat genome.

### 412 **4.1 SNP Discovery**

413 A major bottleneck at this stage was the lack of SNPs between wheat and *Am. muticum*  
414 that could be converted to KASP markers in regions that lacked an existing assay. With  
415 the advent of cheaper sequencing costs, it was possible to sequence the wild relative  
416 species to gain abundant SNPs for KASP assay design, some of which would be polymorphic  
417 between the species. However, in polyploid crops like bread wheat, it is challenging to  
418 generate chromosome-specific KASP assays able to distinguish heterozygous from  
419 homozygous individuals (co-dominant SNPs) and requires extensive validation (Allen et  
420 al. 2011; Allen et al. 2013; Grewal et al. 2020a; Makhoul et al. 2020). Thus, to avoid  
421 homoeologous SNPs which require a cumbersome KASP assay design process involving  
422 allele 'anchoring' for chromosome specificity (Grewal et al. 2020a), the approach taken  
423 here was to find SNPs in single-copy regions of the wheat genome using bioinformatic  
424 tools, thereby, resulting in ~38K SNPs, each specific to a wheat chromosome (Fig. 1).

425 When the wheat genome assembly RefSeq1.0 was published (Appels et al. 2018), the  
426 authors reported the presence of 36,243 conserved subgenome orphan genes, which were  
427 defined as subgenome-specific genes found only in one wheat subgenome but having  
428 homologs in other plant genomes used in that study. They also reported the presence of  
429 30,948 non-conserved orphan genes defined as either singletons or duplicated in the  
430 respective wheat subgenome, which did not have obvious homologs in the other  
431 subgenomes or the other plant genomes used in that study. Thus, the 38K SNPs in single-  
432 copy regions of the wheat genome generated in this work provided an excellent basis for  
433 marker generation although it was not known how many of these SNPs actually lay within  
434 orphan genes. In our previous work based on PCR-amplicon based sequencing and  
435 subsequent SNP discovery (Grewal et al. 2020a), only 18.2% of the 2374 SNP-containing  
436 sequences were found to be in single-copy regions of the wheat genome.

437 The D subgenome was found to have the most SNPs with *Am. muticum* (17,524), almost  
438 double those found with the A subgenome (9,024; Fig. 1). This could possibly have been



439 because of more single-copy regions in the D subgenome than the A subgenome. However,  
440 the previous study suggested that the D subgenome had the least amount of orphan genes  
441 (19,523) compared to the A (22,496) and B (25,172) subgenomes (Appels et al. 2018).  
442 Another possibility could be that *Am. muticum* is more closely related to the progenitors  
443 of the D subgenome i.e., *Ae. tauschii* (McFadden and Sears 1946), which resulted in more  
444 *Am. muticum* sequence reads being mapped to the D subgenome chromosomes in turn  
445 producing more SNPs on the D subgenome. *Am. muticum* was previously classified under  
446 *Aegilops* species as *Aegilops mutica* Boiss. and like *Aegilops sharonensis* could be more  
447 closely related to D genome progenitors than B genome species (Marcussen et al. 2014).  
448 Early reports of homoeology of *Am. muticum* chromosomes suggested that T genome  
449 chromosomes pair with D genome chromosomes almost regularly in F<sub>1</sub> from crosses of  
450 *Am. muticum* with D genome species (Jones and Majisu 1968) and recent reports have  
451 also shown that *Am. muticum* pairs more frequently with D and B genome chromosomes  
452 than with the A subgenome (King et al., 2017). Conversely, the increased number of SNPs  
453 with the D subgenome could be an indication of increased genetic diversity and sequence  
454 variation between the T and D genome species but not enough to prevent the sequences  
455 from being mapped onto the D subgenome.

456 SNP density analysis across 10 Mbp bins across the 21 chromosomes of wheat showed  
457 that SNP-dense regions (>50 SNPs per bin) were skewed to the distal ends of the  
458 chromosomes with a majority on the D genome chromosomes as shown in black in Fig.  
459 2b. This is expected given that gene density on wheat chromosomes decreases towards  
460 centromeric regions (Appels et al. 2018; Brinton et al. 2020; Walkowiak et al. 2020;  
461 Przewieslik-Allen et al. 2021).

#### 462 **4.2 Development of KASP markers**

463 A small portion of these SNPs (698) was selected to be converted into chromosome-  
464 specific KASP markers and added to the existing set of markers to provide a diagnostic  
465 marker for *Am. muticum* every 60 Mbp on a wheat chromosome. Of these, 48% (335)  
466 were validated as functional and robust, able to distinguish between heterozygous and  
467 homozygous introgression genotypes (Fig. 2d), while ~36% (251) failed to amplify a PCR  
468 product. In the previous study involving development of chromosome-specific KASP  
469 markers (Grewal et al. 2020a) only 27% of the assays failed at the PCR stage. This could  
470 potentially be due to presence of sequencing errors or additional SNPs in the flanking  
471 sequence around the target SNP preventing efficient primer-binding in those sites and/or  
472 due to sub-optimal primer design. However, we reduced the percentage of assays that  
473 failed to detect the wild relative allele from 14.1% in the previous study to 7% in this  
474 study. The fact that *Am. muticum* is an outbreeding species and has an increased level of  
475 heterozygosity in its genome sequence could be contributing to the failure of KASP assays  
476 at the validation stage. If the target SNPs are present within the wild species and  
477 polymorphic for both the wild and wheat alleles, then it is possible that the DNA from  
478 plants used as controls for the *Am. muticum* accessions could be genotypes homozygous  
479 for the wheat allele or heterozygous at the target SNP.

480 We also observed 31 (~4.4%) KASP assays that were polymorphic between wheat and  
481 *Am. muticum* but the heterozygous F<sub>1</sub> reference genotypes wrongly clustered as  
482 homozygous with the wheat parents and thus, these KASP markers were deemed  
483 unsuitable for downstream genotyping of introgression lines. A previous study looking into  
484 this false SNP call assignments for some heterozygous genotypes suggested that artificial  
485 heterozygous DNA samples from parental lines, instead of natural heterozygote plants,  
486 can be used to identify false clustering (Makhoul et al. 2020).

487 This new set of KASP markers filled many of the gaps that existed between the markers  
488 developed using SNPs discovered through amplicon- or exome-based sequencing. The few

489 regions where marker distances exceeded the desired 60 Mbp (Fig. 2e) were due to a lack  
490 of SNPs between wheat and *Am. muticum* in those chromosomal regions. Five out of these  
491 seven regions surrounded the centromeres of chromosomes 2D, 3A, 4A, 6A and 7A. As  
492 mentioned before, SNP density around centromeric and peri-centromeric regions is  
493 expected to be low (Brinton et al. 2020; Walkowiak et al. 2020) due to enrichment of  
494 sequence repeats and lower sequencing depths (Choulet et al. 2014; Wen et al. 2017).

#### 495 **4.3 Genotyping of *Am. muticum* DH lines**

496 In total, 498 chromosome-specific KASP assays were used to genotype a set of 67 wheat-  
497 *Am. muticum* DH lines that had previously been characterised using a SNP array (King et  
498 al. 2019). Through KASP genotyping, these lines were shown to have 17 introgressions  
499 from the wild species including whole chromosomes and recombinant segments (Figs. 2f  
500 and g). Details of the parental lineage of each DH line has been published in the earlier  
501 study and as shown in Table 1, several sister DH lines inherited the same introgression  
502 segment from the wild species since they were progenies of the same BC<sub>1</sub> plant.

503 KASP genotyping largely confirmed previous genotyping results of these DH lines but there  
504 were a few cases where the genotyping analysis provided new information which either  
505 negated previous results or highlighted new introgressions not observed previously. The  
506 latter included very small introgressions that were missed in the previous study due to a  
507 lack of markers in those regions and limitations of the GISH technique. After increasing  
508 the density of KASP markers available for identifying *Am. muticum* segments in this study  
509 and using the larger marker set for genotyping these DH lines, 3 new small introgressions  
510 were found: 6T.D2 on 6DL (up to 10 Mbp), 7T.A1 on 7AS (up to 20 Mbp) and 5T.D1 on  
511 5DL (up to 30 Mbp; Table 1, Fig. 3a-c). The chromosome-specificity of the KASP markers  
512 allowed detection of the wheat chromosome that was involved in the recombinant  
513 chromosome or that had been substituted. Thus, it was observed that in DH lines 15 and  
514 16, 2T.A1 was a whole chromosome that had replaced both 2A chromosomes rather than  
515 recombined with B genome chromosomes as previously reported. Where possible due to  
516 the size of the introgression, some of these results were validated by mcGISH in this work  
517 (Fig. 3d-f).

518 The chromosome-specificity of these KASP markers also allowed the detection of a number  
519 of wheat chromosome deletions in the DH lines as shown in Table 1. However, these were  
520 limited to the detection of homozygous deletions. These homozygous deletions included  
521 both whole wheat chromosomes or segments (both large and small) from the wheat  
522 chromosomes. In this context, one of the main observations involved the 15 sister DH  
523 lines (codes between DH-124 to 147 and DH-355 to 357) that showed that the pair of 1B  
524 chromosomes had been deleted in these lines expect for a small segment at the distal end  
525 of 1BL. We proposed that it was this 1BL segment that had translocated/recombined with  
526 a pair of A genome chromosomes, most likely chromosomes 1A. These lines also have 16  
527 A genome chromosomes (King et al. 2019) and so it is possible that the pair of 1A-1BL  
528 recombinant chromosomes are present in addition to the pair of 1A chromosomes since  
529 the KASP markers at the distal end of 1A do not indicate the absence of any of the 1A  
530 wheat alleles.

#### 531 **5. Conclusion**

532 Unlike previous work that relied on PCR-based amplicon sequencing (Grewal et al. 2020a),  
533 this method of generating SNPs between wheat and *Am. muticum* in single-copy regions  
534 of the wheat genome, made possible due to whole genome sequencing of the wild species,  
535 is rapid and allows for the development of chromosome-specific KASP assays. A variety of  
536 wild relative species are being used to increase the genetic diversity in hexaploid wheat.  
537 This approach can therefore be applied to other wheat wild relative species for SNP

538 discovery, highlighting the need for greater investment in whole genome sequencing of  
539 these wild species. These KASP markers have greatly increased our capability to  
540 characterise, screen and identify both introgressions and wheat chromosomal aberrations  
541 in wheat-wild relative introgression lines. However, it is important to note that their  
542 efficiency is dependent on their density across the wheat genome and small introgressions  
543 existing between two KASP markers could have gone undetected. With the reducing cost  
544 of DNA sequencing, we envisage that the next improvement in characterisation of such  
545 introgressions, with the potential to give higher resolution, would be low-coverage whole  
546 genome resequencing of wheat-wild relative introgression lines.

547

## 548 **6. References**

- 549 Allen AM, Barker GL, Berry ST, Coghill JA, Gwilliam R, Kirby S, et al. (2011) Transcript-  
550 specific, single-nucleotide polymorphism discovery and linkage analysis in hexaploid  
551 bread wheat (*Triticum aestivum* L.). *Plant Biotechnol J* 9:1086-1099.  
552 <https://doi.org/10.1111/j.1467-7652.2011.00628.x>
- 553 Allen AM, Barker GLA, Wilkinson P, BurrIDGE A, Winfield M, Coghill J, et al. (2013)  
554 Discovery and development of exome-based, co-dominant single nucleotide  
555 polymorphism markers in hexaploid wheat (*Triticum aestivum* L.). *Plant Biotechnol J*  
556 11:279-295. <https://doi.org/doi:10.1111/pbi.12009>
- 557 Allen AM, Winfield MO, BurrIDGE AJ, Downie RC, Benbow HR, Barker GL, et al. (2017)  
558 Characterization of a Wheat Breeders' Array suitable for high-throughput SNP genotyping  
559 of global accessions of hexaploid bread wheat (*Triticum aestivum*). *Plant Biotechnol J*  
560 15:390-401. <https://doi.org/10.1111/pbi.12635>
- 561 Appels R, Eversole K, Feuillet C, Keller B, Rogers J, Stein N, et al. (2018) Shifting the  
562 limits in wheat research and breeding using a fully annotated reference genome. *Science*  
563 361:eaar7191. <https://doi.org/10.1126/science.aar7191>
- 564 Baker L, Grewal S, Yang C-y, Hubbart-Edwards S, Scholefield D, Ashling S, et al. (2020)  
565 Exploiting the genome of *Thinopyrum elongatum* to expand the gene pool of hexaploid  
566 wheat. *Theor Appl Genet* 133:2213-2226. <https://doi.org/10.1007/s00122-020-03591-3>
- 567 Bansal M, Adamski NM, Toor PI, Kaur S, Molnár I, Holušová K, et al. (2020) *Aegilops*  
568 *umbellulata* introgression carrying leaf rust and stripe rust resistance genes Lr76 and  
569 Yr70 located to 9.47-Mb region on 5DS telomeric end through a combination of  
570 chromosome sorting and sequencing. *Theor Appl Genet* 133:903-915.  
571 <https://doi.org/10.1007/s00122-019-03514-x>
- 572 Brinton J, Ramirez-Gonzalez RH, Simmonds J, Wingen L, Orford S, Griffiths S, et al.  
573 (2020) A haplotype-led approach to increase the precision of wheat breeding. *Comms*  
574 *Biol* 3:712. <https://doi.org/10.1038/s42003-020-01413-2>
- 575 Camacho C, Coulouris G, Avagyan V, Ma N, Papadopoulos J, Bealer K and Madden TL  
576 (2009) BLAST+: architecture and applications. *BMC Bioinformatics* 10:421.  
577 <https://doi.org/10.1186/1471-2105-10-421>
- 578 Choulet F, Alberti A, Theil S, Glover N, Barbe V, Daron J, et al. (2014) Structural and  
579 functional partitioning of bread wheat chromosome 3B. *Science* 345:1249721.  
580 <https://doi.org/10.1126/science.1249721>
- 581 Cseh A, Megyeri M, Yang C, Hubbart-Edwards S, Scholefield D, Ashling SS, King IP, King  
582 J and Grewal S (2019a) Development of a New A<sup>m</sup>-Genome-Specific Single Nucleotide

- 583 Polymorphism Marker Set for the Molecular Characterization of Wheat–*Triticum*  
584 *monococcum* Introgression Lines. *The Plant Genome* 12:180098.  
585 <https://doi.org/10.3835/plantgenome2018.12.0098>
- 586 Cseh A, Yang C, Hubbart-Edwards S, Scholefield D, Ashling SS, Burrridge AJ, et al.  
587 (2019b) Development and validation of an exome-based SNP marker set for  
588 identification of the St, Jr and Jvs genomes of *Thinopyrum intermedium* in a wheat  
589 background. *Theor Appl Genet* 132:1555-1570 <https://doi.org/10.1007/s00122-019-03300-9>  
590
- 591 DePristo MA, Banks E, Poplin R, Garimella KV, Maguire JR, Hartl C, et al. (2011) A  
592 framework for variation discovery and genotyping using next-generation DNA  
593 sequencing data. *Nature Genetics* 43:491-498. <https://doi.org/10.1038/ng.806>
- 594 Devi U, Grewal S, Yang CY, Hubbart-Edwards S, Scholefield D, Ashling S, Burrridge A,  
595 King IP and King J (2019) Development and characterisation of interspecific hybrid lines  
596 with genome-wide introgressions from *Triticum timopheevii* in a hexaploid wheat  
597 background. *BMC Plant Biol* 19:183. <https://doi.org/10.1186/s12870-019-1785-z>
- 598 Devos KM, Dubcovsky J, Dvorak J, Chinoy CN and Gale MD (1995) Structural evolution  
599 of wheat chromosomes 4A, 5A, and 7B and its impact on recombination. *Theor. Appl.*  
600 *Genet.* 91:282-288. <https://doi.org/10.1007/bf00220890>
- 601 Dvořák J, Terlizzi Pd, Zhang H-B and Resta P (1993) The evolution of polyploid wheats:  
602 identification of the A genome donor species. *Genome* 36:21-31.  
603 <https://doi.org/10.1139/g93-004>
- 604 Dvorak J, Wang L, Zhu T, Jorgensen CM, Luo MC, Deal KR, et al. (2018) Reassessment  
605 of the evolution of wheat chromosomes 4A, 5A, and 7B. *Theor Appl Genet* 131:2451-  
606 2462. <https://doi.org/10.1007/s00122-018-3165-8>
- 607 Fricano A, Brandolini A, Rossini L, Sourdille P, Wunder J, Effgen S, et al. (2014)  
608 Crossability of *Triticum urartu* and *Triticum monococcum* wheats, homoeologous  
609 recombination, and description of a panel of interspecific introgression lines. *G3*  
610 (Bethesda, Md.) 4:1931-1941. <https://doi.org/10.1534/g3.114.013623>
- 611 Grewal S, Hubbart-Edwards S, Yang C, Devi U, Baker L, Heath J, et al. (2020a) Rapid  
612 identification of homozygosity and site of wild relative introgressions in wheat through  
613 chromosome-specific KASP genotyping assays. *Plant Biotechnol J* 18:743-755.  
614 <https://doi.org/10.1111/pbi.13241>
- 615 Grewal S, Hubbart-Edwards S, Yang C, Scholefield D, Ashling S, Burrridge A, Wilkinson  
616 PA, King IP and King J (2018a) Detection of *T. urartu* Introgressions in Wheat and  
617 Development of a Panel of Interspecific Introgression Lines. *Front Plant Sci* 9:1565.  
618 <https://doi.org/10.3389/fpls.2018.01565>
- 619 Grewal S, Othmeni M, Walker J, Hubbart-Edwards S, Yang C-y, Scholefield D, et al.  
620 (2020b) Development of Wheat-*Aegilops caudata* Introgression Lines and Their  
621 Characterisation Using Genome-Specific KASP Markers. *Front Plant Sci* 11:606.  
622 <https://doi.org/10.3389/fpls.2020.00606>
- 623 Grewal S, Yang C, Edwards SH, Scholefield D, Ashling S, Burrridge AJ, King IP and King J  
624 (2018b) Characterisation of *Thinopyrum bessarabicum* chromosomes through genome-  
625 wide introgressions into wheat. *Theor Appl Genet* 131:389-406.  
626 <https://doi.org/10.1007/s00122-017-3009-y>

- 627 Han G, Liu S, Jin Y, Jia M, Ma P, Liu H, Wang J and An D (2020) Scale development and  
628 utilization of universal PCR-based and high-throughput KASP markers specific for  
629 chromosome arms of rye (*Secale cereale* L.). *BMC Genomics* 21:206.  
630 <https://doi.org/10.1186/s12864-020-6624-y>
- 631 Jones JK and Majisu BN (1968) The homoeology of *Aegilops mutica* chromosomes.  
632 *Canadian Journal of Genetics and Cytology* 10:620-626.
- 633 King J, Grewal S, Yang C-Y, Hubbart Edwards S, Scholefield D, Ashling S, et al. (2018)  
634 Introgression of *Aegilops speltoides* segments in *Triticum aestivum* and the effect of the  
635 gametocidal genes. *Annals of botany* 121:229-240. <https://doi.org/10.1093/aob/mcx149>
- 636 King J, Grewal S, Yang CY, Hubbart S, Scholefield D, Ashling S, et al. (2017) A step  
637 change in the transfer of interspecific variation into wheat from *Amblyopyrum muticum*.  
638 *Plant Biotechnol J* 15:217-226. <https://doi.org/10.1111/pbi.12606>
- 639 King J, Newell C, Grewal S, Hubbart-Edwards S, Yang C-y, Scholefield D, Ashling S,  
640 Stride A and King IP (2019) Development of Stable Homozygous Wheat/*Amblyopyrum*  
641 *muticum* (*Aegilops mutica*) Introgression Lines and Their Cytogenetic and Molecular  
642 Characterization. *Front Plant Sci* 10:34. <https://doi.org/10.3389/fpls.2019.00034>
- 643 Li H (2011) A statistical framework for SNP calling, mutation discovery, association  
644 mapping and population genetical parameter estimation from sequencing data.  
645 *Bioinformatics* 27:2987-2993. <https://doi.org/10.1093/bioinformatics/btr509>
- 646 Li H (2013) Aligning sequence reads, clone sequences and assembly contigs with BWA-  
647 MEM. arXiv:1303.3997 [q-bio.GN].
- 648 Li H, Handsaker B, Wysoker A, Fennell T, Ruan J, Homer N, et al. (2009) The Sequence  
649 Alignment/Map format and SAMtools. *Bioinformatics* 25:2078-2079.  
650 <https://doi.org/10.1093/bioinformatics/btp352>
- 651 Lou H, Dong L, Zhang K, Wang D-W, Zhao M, Li Y, et al. (2017) High-throughput mining  
652 of E-genome-specific SNPs for characterizing *Thinopyrum elongatum* introgressions in  
653 common wheat. *Molecular Ecology Resources* 17:1318-1329.  
654 <https://doi.org/10.1111/1755-0998.12659>
- 655 Makhoul M, Rambla C, Voss-Fels KP, Hickey LT, Snowdon RJ and Obermeier C (2020)  
656 Overcoming polyploidy pitfalls: a user guide for effective SNP conversion into KASP  
657 markers in wheat. *Theor Appl Genet* 133:2413-2430. <https://doi.org/10.1007/s00122-020-03608-x>
- 659 Marcussen T, Sandve SR, Heier L, Spannagl M, Pfeifer M, Jakobsen KS, et al. (2014)  
660 Ancient hybridizations among the ancestral genomes of bread wheat. *Science*  
661 345:1250092. <https://doi.org/10.1126/science.1250092>
- 662 McFadden ES and Sears ER (1946) The origin of *Triticum spelta* and its free-threshing  
663 hexaploid relatives. *J Hered* 37:81-107.
- 664 Niu Z, Chao S, Cai X, Whetten RB, Breiland M, Cowger C, et al. (2018) Molecular and  
665 Cytogenetic Characterization of Six Wheat-*Aegilops markgrafii* Disomic Addition Lines  
666 and Their Resistance to Rusts and Powdery Mildew. *Front Plant Sc* 9:1616.  
667 <https://doi.org/10.3389/fpls.2018.01616>
- 668 Pallotta M, Warner P, Fox R, Kuchel H, Jefferies S and Langridge P (2003) Marker  
669 assisted wheat breeding in the southern region of Australia. *Proceedings of the 10th*



- 670 Internaional Wheat Genetics Symposium, Paestum, Italy: Istituto Sperimentale per la  
671 Cerealicoltura.
- 672 Pont C, Leroy T, Seidel M, Tondelli A, Duchemin W, Armisen D, et al. (2019) Tracing the  
673 ancestry of modern bread wheats. *Nat Genet* 51:905-911.  
674 <https://doi.org/10.1038/s41588-019-0393-z>
- 675 Przewieslik-Allen AM, Wilkinson PA, Burr ridge AJ, Winfield MO, Dai X, Beaumont M, et al.  
676 (2021) The role of gene flow and chromosomal instability in shaping the bread wheat  
677 genome. *Nature Plants* 7:172-183. <https://doi.org/10.1038/s41477-020-00845-2>
- 678 Qi L, Friebe B, Zhang P and Gill BS (2007) Homoeologous recombination, chromosome  
679 engineering and crop improvement. *Chromosome Research* 15:3-19.  
680 <https://doi.org/10.1007/s10577-006-1108-8>
- 681 Ramirez-Gonzalez RH, Uauy C and Caccamo M (2015) PolyMarker: A fast polyploid  
682 primer design pipeline. *Bioinformatics* 31:2038-2039.  
683 <https://doi.org/10.1093/bioinformatics/btv069>
- 684 Rasheed A, Hao Y, Xia X, Khan A, Xu Y, Varshney RK and He Z (2017) Crop Breeding  
685 Chips and Genotyping Platforms: Progress, Challenges, and Perspectives. *Mol Plant*  
686 10:1047-1064. <https://doi.org/10.1016/j.molp.2017.06.008>
- 687 Tiwari VK, Wang S, Sehgal S, Vrana J, Friebe B, Kubalaková M, et al. (2014) SNP  
688 Discovery for mapping alien introgressions in wheat. *BMC Genomics* 15:273.  
689 <https://doi.org/10.1186/1471-2164-15-273>
- 690 Varshney RK, Nayak SN, May GD and Jackson SA (2009) Next-generation sequencing  
691 technologies and their implications for crop genetics and breeding. *Trends in*  
692 *Biotechnology* 27:522-530. <https://doi.org/10.1016/j.tibtech.2009.05.006>
- 693 Walkowiak S, Gao L, Monat C, Haberer G, Kassa MT, Brinton J, et al. (2020) Multiple  
694 wheat genomes reveal global variation in modern breeding. *Nature* 588:277-283.  
695 <https://doi.org/10.1038/s41586-020-2961-x>
- 696 Wang S, Wong D, Forrest K, Allen A, Chao S, Huang BE, et al. (2014) Characterization of  
697 polyploid wheat genomic diversity using a high-density 90,000 single nucleotide  
698 polymorphism array. *Plant Biotechnol J* 12:787-796. <https://doi.org/10.1111/pbi.12183>
- 699 Wen W, He Z, Gao F, Liu J, Jin H, Zhai S, Qu Y and Xia X (2017) A High-Density  
700 Consensus Map of Common Wheat Integrating Four Mapping Populations Scanned by the  
701 90K SNP Array. *Front Plant Sc* 8-1389. <https://doi.org/10.3389/fpls.2017.01389>
- 702 Winfield MO, Allen AM, Burr ridge AJ, Barker GL, Benbow HR, Wilkinson PA, et al. (2016)  
703 High-density SNP genotyping array for hexaploid wheat and its secondary and tertiary  
704 gene pool. *Plant Biotechnol J* 14:1195-1206. <https://doi.org/10.1111/pbi.12485>
- 705 Winfield MO, Wilkinson PA, Allen AM, Barker GL, Coghill JA, Burr ridge A, et al. (2012)  
706 Targeted re-sequencing of the allohexaploid wheat exome. *Plant Biotechnol J* 10:733-  
707 742. <https://doi.org/10.1111/j.1467-7652.2012.00713.x>
- 708 Wu J, Yang X, Wang H, Li H, Li L, Li X and Liu W (2006) The introgression of  
709 chromosome 6P specifying for increased numbers of florets and kernels from *Agropyron*  
710 *cristatum* into wheat. *Theor App Genet* 114:13-20. [https://doi.org/10.1007/s00122-006-](https://doi.org/10.1007/s00122-006-0405-0)  
711 0405-0

- 712 Xu J, Wang L, Deal KR, Zhu T, Ramasamy RK, Luo M-C, et al. (2020) Genome-wide  
713 introgression from a bread wheat × *Lophopyrum elongatum* amphiploid into wheat. *Theor*  
714 *App Genet* 133:1227-1241. <https://doi.org/10.1007/s00122-020-03544-w>
- 715 Zhang W, Cao Y, Zhang M, Zhu X, Ren S, Long Y, et al. (2017) Meiotic Homoeologous  
716 Recombination-Based Alien Gene Introgression in the Genomics Era of Wheat. *Crop Sc*  
717 57:1189-1198. <https://doi.org/10.2135/cropsci2016.09.0819>
- 718 Zhao R, Wang H, Xiao J, Bie T, Cheng S, Jia Q, et al. (2013) Induction of 4VS  
719 chromosome recombinants using the CS *ph1b* mutant and mapping of the wheat yellow  
720 mosaic virus resistance gene from *Haynaldia villosa*. *Theor Appl Genet* 126:2921-2930.  
721 <https://doi.org/10.1007/s00122-013-2181-y>
- 722 Zhou S, Zhang J, Che Y, Liu W, Lu Y, Yang X, et al. (2018) Construction of *Agropyron*  
723 *Gaertn.* genetic linkage maps using a wheat 660K SNP array reveals a homoeologous  
724 relationship with the wheat genome. *Plant Biotechnology Journal* 16:818-827.  
725 <https://doi.org/10.1111/pbi.12831>
